# Supplementary material for: Inhibition of fatty acid desaturation is detrimental to cancer cell survival in metabolically compromised environments
Source: Springer Nature journal article supplement (doi:10.1186/s40170-016-0146-8), 2016-03-18
Supplement: MOESM1 [file 25788180]

**a**

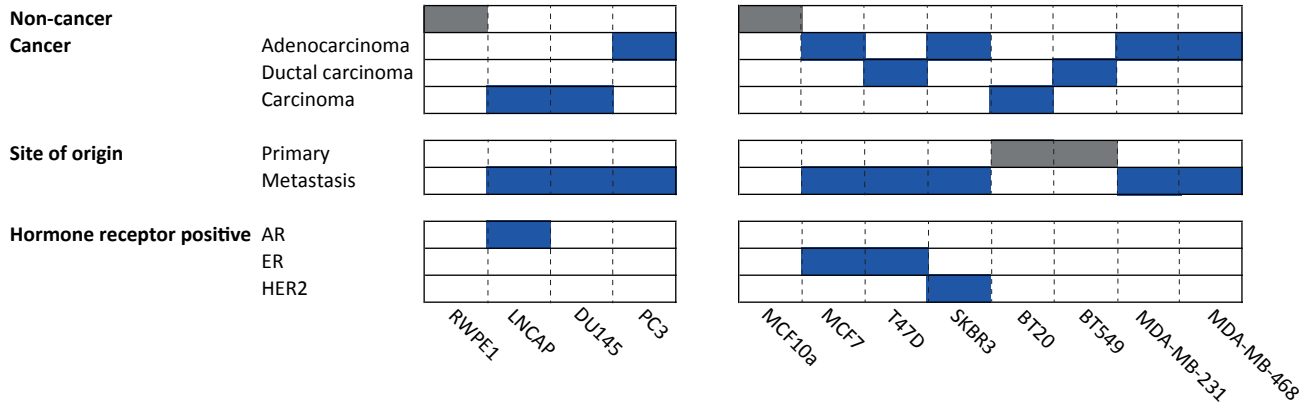

**b**

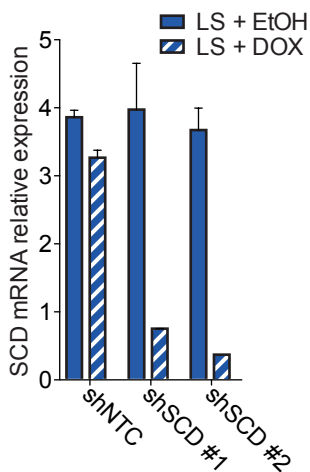

**c**

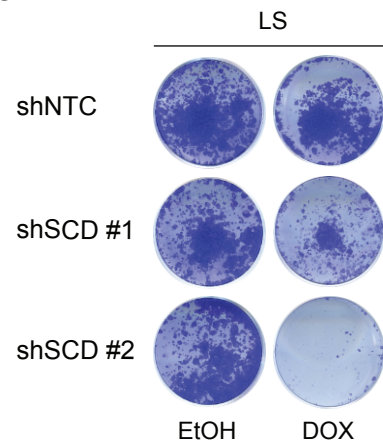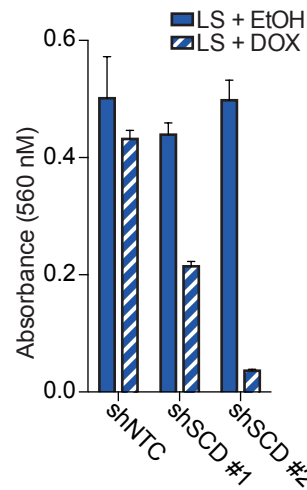

**d**

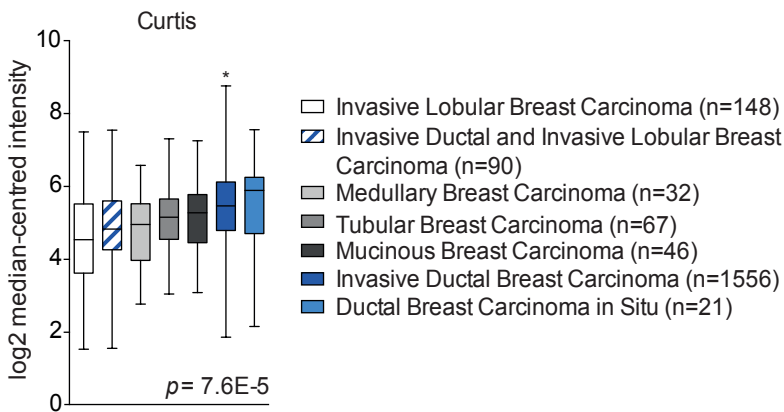

**f**

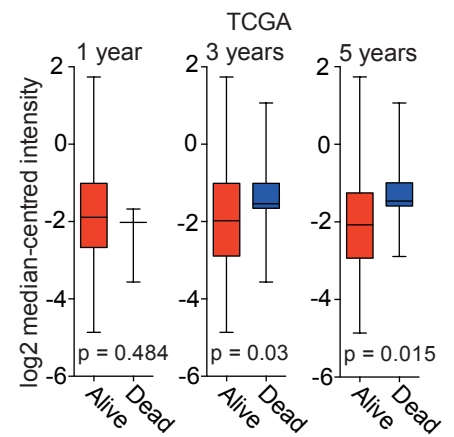

**e**

| Pvalue | Study           | Tumour type                                    |
|--------|-----------------|------------------------------------------------|
| 0.005  | vantVeer Breast | Breast Carcinoma - High grade                  |
| 0.006  | Ma Breast       | Ductal Breast Carcinoma Epithelia - High grade |
| 0.006  | Schmidt Breast  | Invasive Breast Carcinoma - High grade         |
| 0.015  | Bittner Breast  | Ductal Breast Carcinoma - High grade           |
