# Supplementary material for: Inhibition of fatty acid desaturation is detrimental to cancer cell survival in metabolically compromised environments
Source: Springer Nature journal article supplement (doi:10.1186/s40170-016-0146-8), 2016-03-18

**a**

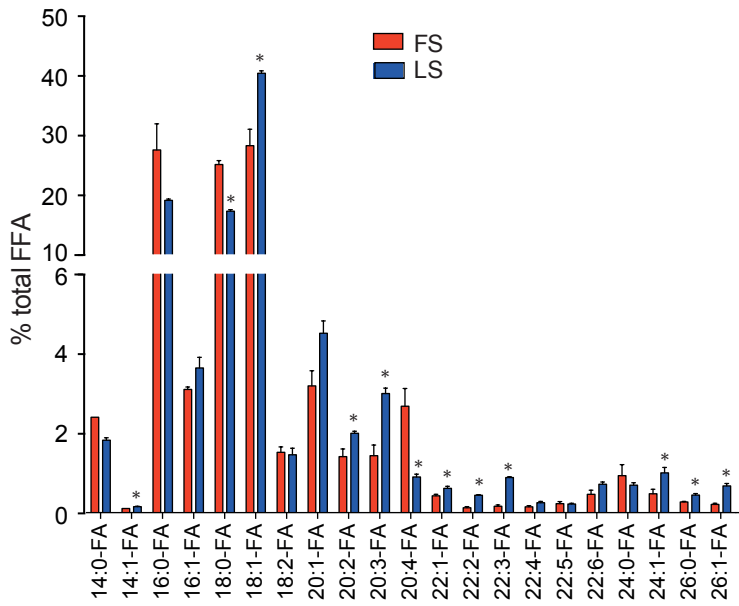

**b**

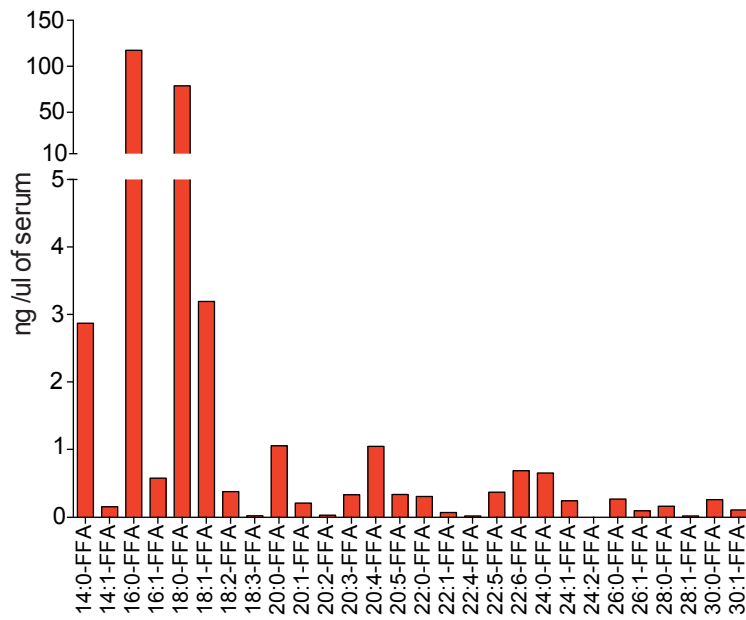

**c**

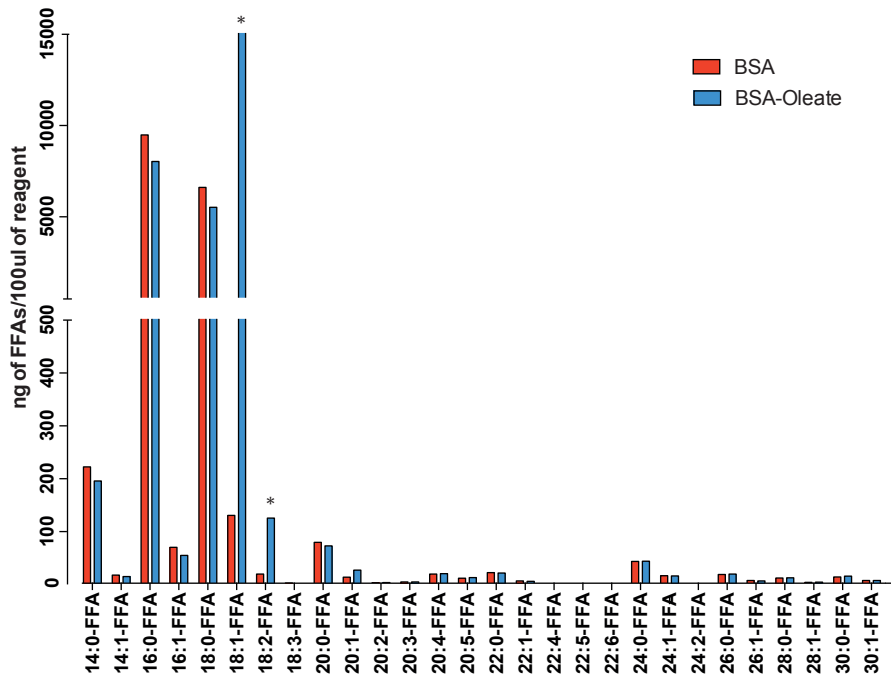

Supplement: MOESM2 [file 25788180]
